# Supplementary material for: Proteinadsorption behavior in batch and competitive conditions with nanoparticle surface imprinting
Source: Royal Society of Chemistry journal article supplement (doi:10.1039/c2ra21830e), 2012-11-23
Supplement: c2ra21830e.pdf [file c2ra21830e.pdf]

1 Appendix A-Supporting information

2

3 Protein adsorption behavior in batch and competitive conditions with nanoparticle surface imprinting

4 *Niranjani Sankarakumar<sup>a</sup>, Yen Wah Tong<sup>a, b\*</sup>*

5 <sup>a</sup>Department of Chemical & Biomolecular Engineering, National University of Singapore

6 <sup>b</sup>Department of Bioengineering, National University of Singapore

7 21 Lower Kent Ridge Road, Singapore 119077

8 \*Corresponding author: Yen Wah Tong; Tel: +65-65168467; Email: chetyw@nus.edu.sg

9

10

11

12

13

14

15

16

17

18

19

### 20 **A.1. Swelling experiments**

21 The imprinted polymeric particles dispersed in water were recovered by centrifugation at 9000 rpm  
22 for 40 min. The swollen weight ( $W_W$ ) of the particles was measured. Subsequently, the particles were  
23 freeze-dried for 24 h and weighed again to obtain the dry weight ( $W_D$ ). The swelling ratio (S.R) of the  
24 polymer was then calculated as follows:

$$25 \quad \text{S.R} = (W_W - W_D) / W_D \quad \text{Eq. (A.1)}$$

26 The S.R (Table A.1) is usually an indicator of the extent of cross-linking and hence the flexibility  
27 of the imprinted cavities. The S.R values obtained in this work were comparable to our previous work  
28 in which the values were in between 3-5.

29

### 30 **A.2. Imprinting Efficiency**

31 The parameter, imprinting efficiency (I.E), define the degree of template-monomer complexation<sup>1</sup>.  
32 Higher number of template-monomer interactions results in stronger template-monomer complexation  
33 and hence higher I.E values, assuming negligible template-template complexes. The I.E values of the  
34 protein imprinted particles were calculated based on the amount of protein adsorbed, as follows:

35

36

$$37 \quad \text{I.E} = Q_{\text{iMIP}} / Q_{\text{iNIP}} \quad \text{Eq. (A.2)}$$

38 where  $Q_{\text{iMIP}}$  and  $Q_{\text{iNIP}}$  are the static equilibrium adsorption capacity of iMIPs and iNIPs respectively  
39 ( $\mu\text{mol g}^{-1}$ ).

40

### 41 **A.3. Selectivity parameters of the polymers**

42 Molecular recognition selectivity was evaluated by the following parameters calculated according to  
43 the adsorbed protein concentrations of the protein imprinted and control particles obtained in the  
44 competitive adsorption tests under equilibrium conditions<sup>2</sup>:

45 Separation factor,  $\alpha = K_{D1}/K_{D2}$  Eq. (A.3)

46 where  $K_{D1}$  and  $K_{D2}$  are the static distribution coefficients of the template and the control molecules.  
47  $K_D$  is the ratio of the amount of ligand adsorbed and free ligand concentration.

48 Relative separation factor,  $\beta = \alpha_1/\alpha_2$  Eq. (A.4)

49 where  $\alpha_1$  and  $\alpha_2$  are the separation factors of the imprinted and control nanoparticles respectively.

50

#### 51 **A.4. Zeta potential of imprinted nanoparticles**

52 A Zetasizer Nano-ZS (Malvern Instruments, UK) was used to measure the zeta potential of all the  
53 polymeric nanoparticles prepared.

54

#### 55 **A.5. Experimental and theoretical binding site density relation**

56 We can theoretically calculate the maximum binding site density ( $N_{max}$ ) taking RNase A as the  
57 protein of interest as follows. Based on the protein concentration used during the immobilization step,  
58 the maximum amount of RNase A immobilized on the core beads would be not more than 25 mg/g.  
59 The mass percentage of the external shell layer over the core beads in the final core-shell imprinted  
60 particles can be calculated from the magnetite encapsulation efficiency assuming negligible mass  
61 change of the core particles due to the surface modification reactions. TGA results showed that the  
62 magnetite encapsulation efficiency for the unmodified core particles and the resulting core-shell  
63 imprinted particles were 13.28 wt% and 4.44 wt%, respectively. Hence, the weight percentage of the

64 shell is calculated to be 66.6 %  $((0.1328 - 0.0444) / 0.1328)$ . Therefore, the maximum template  
65 amount embedded in the imprinted particles before the template removal is estimated to be 8.4 mg/g  
66  $(25 / [1 + 0.666 / (1 - 0.666)])$ . Assuming that all the nitrogen originates from the template protein  
67 molecules, there are 169 nitrogen atoms in 1 RNase A molecule and each binding site is  
68 occupied/created by one template protein molecule, the total number of RNase A molecules  
69 immobilized ( $N_{RNase\ A}$ ) can be calculated. Thus,  $N_{max}$  is the ratio of  $N_{RNase\ A}$  to  $N_p$ , where is the total  
70 number of nanoparticles.

71

$$72 \quad N_{max} = \frac{N_{RNaseA}}{N_p} = \frac{2.14 \times 10^{18}}{N_p}$$

73

74 From the single protein adsorption kinetics, the measured specific RNase A rebinding on the  
75 imprinted particles achieved 89.3 mg/g. The experimental binding site density in this case is

76

$$77 \quad N_{Exp} = \frac{N_{RNaseA}}{N_p} = \frac{2.27 \times 10^{19}}{N_p}$$

78

$$79 \quad N_{Exp} = 10.6 N_{max}$$

80

## 81 **References**

- 82 1. S. Srebnik, *Chem. Mater.*, 2004, **16**, 883-888.
- 83 2. S. Lu, G. Cheng and X. Pang, *J. Appl. Polym. Sci.*, 2006, **99**, 2401-2407.

84

85

86

87

88

89

90

**Table A.1** Sizes and Swelling measurements

| Polymer particles | Mean diameter <sup>a</sup> (nm) | Polydispersity | Swelling ratio |
|-------------------|---------------------------------|----------------|----------------|
| Core              | 368 ± 3.7                       | 0.205          | -              |
| LiMIP             | 582 ± 5.3                       | 0.012          | 3.54 ± 0.70    |
| iNIP              | 513 ± 4.8                       | 0.065          | 2.28 ± 0.38    |
| RiMIP             | 553 ± 4.6                       | 0.109          | 3.94 ± 0.59    |

91 <sup>a</sup>Obtained from Dynamic light scattering (DLS) measurements.

92

**Table A.2** Surface atomic composition (%) of all particles from XPS wide scan spectra

| Polymer particles            | C     | O     | N    |
|------------------------------|-------|-------|------|
| Core                         | 71.63 | 28.37 | 0.00 |
| RNase A immobilized core     | 68.50 | 27.01 | 4.49 |
| Lys immobilized core         | 72.37 | 23.06 | 4.57 |
| RiMIP<br>(Before hydrolysis) | 44.98 | 52.89 | 2.13 |
| LiMIP<br>(Before hydrolysis) | 73.42 | 24.42 | 2.16 |
| RiMIP<br>(After hydrolysis)  | 63.98 | 35.62 | 0.40 |
| LiMIP<br>(After hydrolysis)  | 73.36 | 26.64 | 0.35 |

93

94

**Table A.3** Physico-chemical properties of the proteins

| Property                                                                                                              | Lys             | RNase A         | BSA            |
|-----------------------------------------------------------------------------------------------------------------------|-----------------|-----------------|----------------|
| Molecular mass (g mol <sup>-1</sup> )                                                                                 | 14600           | 13600           | 66000          |
| Size (nm <sup>3</sup> )                                                                                               | 4.5 x 3.0 x 3.0 | 3.8 x 2.8 x 2.2 | 4.0 x 4.0 x 14 |
| Isoelectric point (IEP)                                                                                               | 11.1            | 9.4             | 4.8            |
| Adiabatic compressibility (k <sub>s</sub> )<br>(x10 <sup>-6</sup> cm <sup>3</sup> g <sup>-1</sup> bar <sup>-1</sup> ) | 3.6             | 0.8             | 6.5            |

95

96

**Table A.4** Imprinting efficiencies

| Particles imprinted with | Single <sup>a</sup> | Binary <sup>b</sup> | Ternary <sup>c</sup> |
|--------------------------|---------------------|---------------------|----------------------|
| Lys                      | 7.70                | 6.75                | 1.93                 |
| RNase A                  | 6.27                | 1.20                | 0.74                 |

<sup>a</sup>Initial concentration of Lys: 1.8 mg mL<sup>-1</sup> & RNase A: 2 mg mL<sup>-1</sup>.

<sup>b</sup>An equimolar mixture of Lys & RNase A were used.

<sup>c</sup>A 1:1:2 mixture of Lys: RNase A: Albumin was used.

97  
98  
99  
100

**Table A.5** Selectivity parameters of the polymers

| Polymer particles | K <sub>D</sub> (mL g <sup>-1</sup> ) |         | α                   | β     |
|-------------------|--------------------------------------|---------|---------------------|-------|
|                   | Lys                                  | RNase A |                     |       |
| LiMIP             | 59.94                                | 7.26    | 8.26 (Lys-RNase A)  | 27.07 |
| iNIP              | 5.71                                 | 18.73   | 0.31                |       |
| RiMIP             | 87.48                                | 33.19   | 0.38 (RNase A- Lys) | 0.12  |
| iNIP              | 5.71                                 | 18.73   | 3.28                |       |

101  
102

**Table A.6** Zeta potential measurements

| Polymer particles | Zeta potential <sup>a</sup> (mV) |
|-------------------|----------------------------------|
| LiMIP             | -0.0798 ± 0.09                   |
| iNIP              | -0.0888 ± 0.02                   |
| RiMIP             | -0.0169 ± 0.04                   |

<sup>a</sup>All particles were measured in 0.01M phosphate buffered saline (PBS), pH 7.4 at 25°C

103  
104  
105

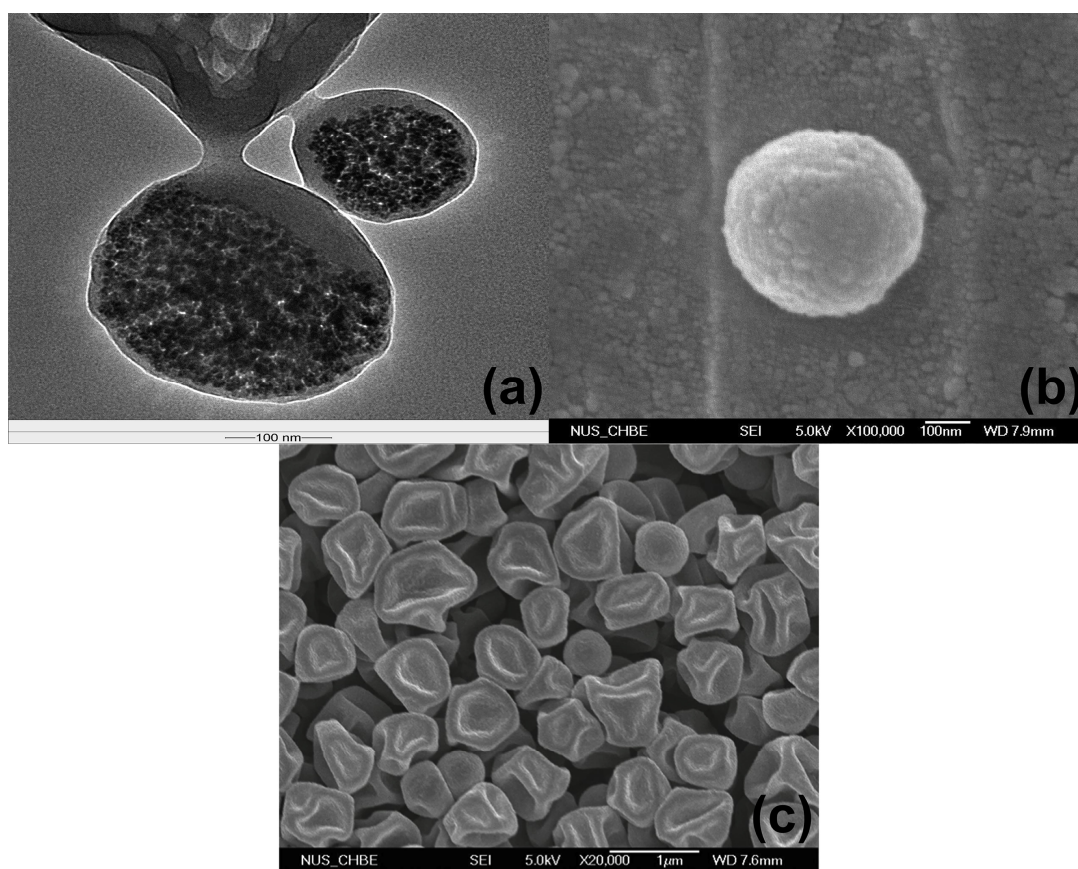

106

107 **Fig. A.1** Electron micrographs of particles (a) TEM image of core particles (b) FESEM images of  
108 core and (c) core-shell nanoparticles. There was no significant morphological difference between the  
109 imprinted and control particles in the SEM images.

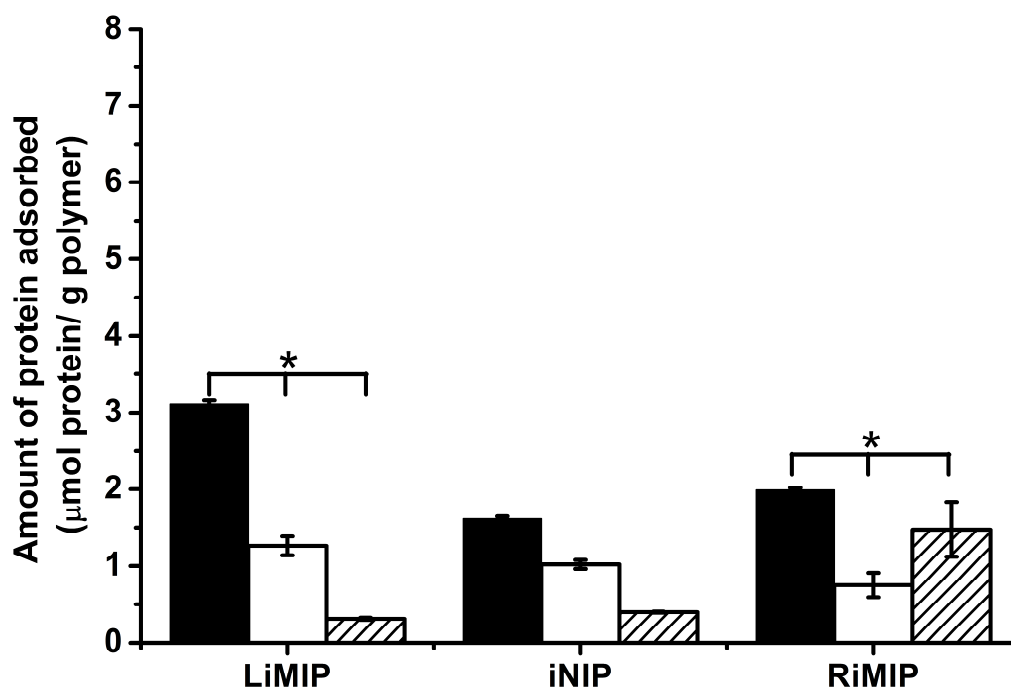

110

111 **Fig. A.2** Ternary protein equilibrium adsorption analyses of LiMIPs and RiMIPs. A mixture  
112 containing 25 mol% each of Lys & RNase A and 50 mol% BSA was mixed with the nanoparticles.  
113 Error bars represent standard error. Statistical significance was denoted by \*. One-way ANOVA:  
114  $p < 0.05$ . iNIPs were used as control samples (■, Lys; □, RNase A; ▨, BSA)

115

116

117

118

119

120



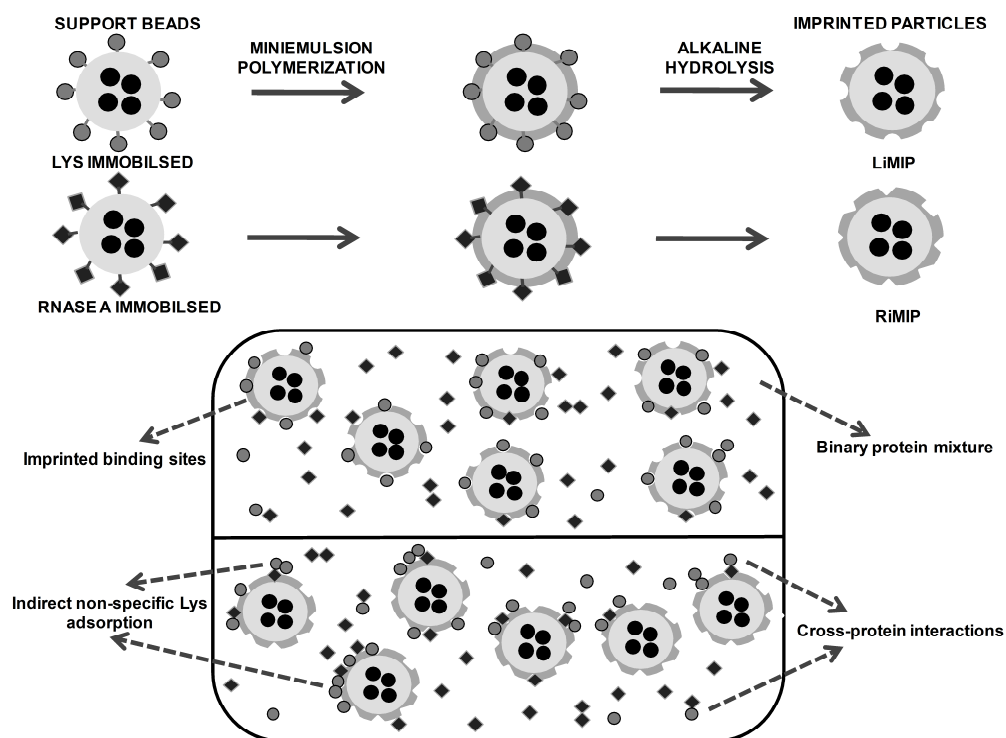

121

122 **Fig. A.3** An illustration of competitive protein adsorption behaviour of Lys and RNase A imprinted  
123 nanoparticles. The figure depicts the specific adsorption of Lys (template) by the LiMIPs due to the  
124 imparted molecular affinity and the high non-specific adsorption of Lys (non-template in this case) by  
125 the RiMIPs owing to strong cross-protein interactions during binary protein adsorption process.

126

127

128

129

130

131

132

133

134

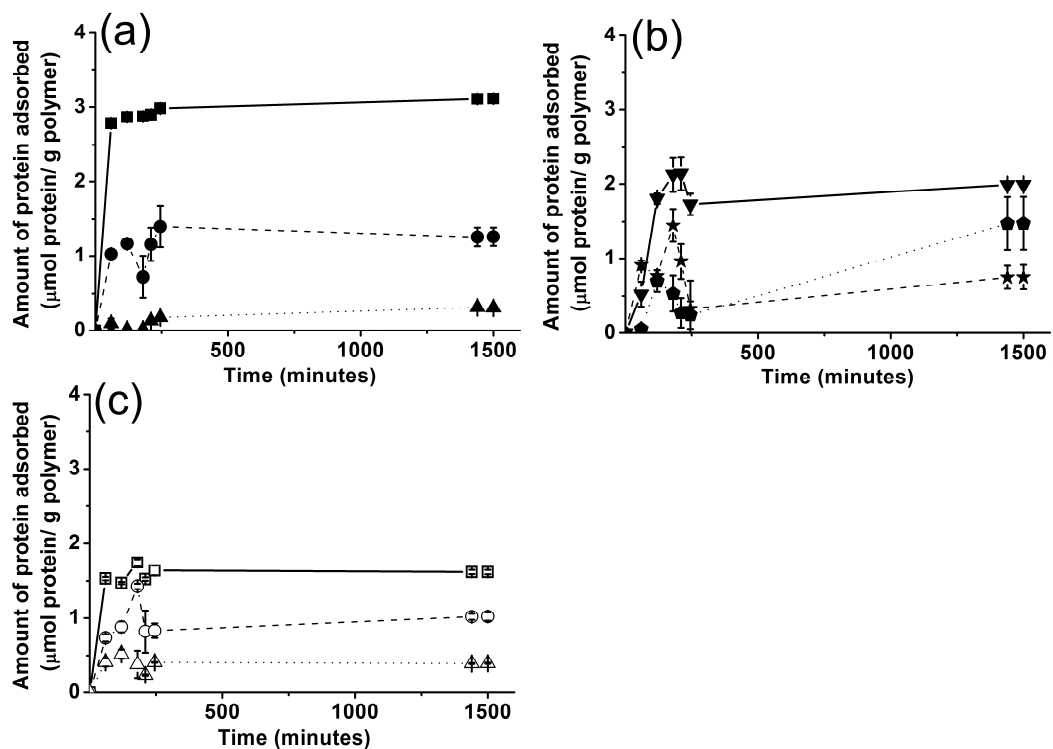

135

136

137

138

139

**Fig. A.4** Ternary protein adsorption kinetics of (a) LiMIP (b) RiMIP (c) iNIP. iNIPs were used as control samples (■, LiMIP-Lys; ●, LiMIP-RNase A; ▲, LiMIP-BSA; ▼, RiMIP-Lys; ★, RiMIP-RNase A; ◆, RiMIP-BSA; □, iNIP-Lys; ○, iNIP-RNase A; △, iNIP-BSA).
